# Supplementary material
Source: publisher figshare collection journal article supplement (https://gsapubs.figshare.com/ndownloader/files/23319803)
Supplement: Supplementary file 1 [file 23319803]

## Sheet: Sheet2
Depth-cm	OM (%)	CO3 (%)
102.143	4.55228	4.50225
110.714	4.44333	4.15286
119.286	4.58853	4.14872
127.857	4.14172	4.21884
136.429	4.24152	4.21884
145	4.84032	4.0147
153.571	4.80721	3.41421
162.143	5.39191	3.47206
170.714	5.05506	3.549
179.286	4.19371	3.60822
187.857	4.10822	3.89415
196.429	3.84423	4.22094
205	4.83791	4.35275
212.692	4.29785	4.49775
220.385	4.19162	4.69516
228.077	4.15415	4.43625
235.769	2.64735	4.4955
243.462	3.4	4.22727
251.154	3.84423	4.62942
258.846	4.09182	4.28688
266.538	2.95	4.29545
274.231	3.95593	4.57504
281.923	4.04192	4.62711
289.615	4.50902	4.64565
297.308	3.84808	2.79406
305	5.3	3.40909
313.098	4.80721	3.68735
321.197	4.9	3.75
329.295	4.65699	3.82392
337.393	4.45892	4.03079
345.492	4.8048	3.822
353.59	4.64072	2.92597
361.689	4.74763	3.06665
369.787	5.90886	2.79965
377.885	4.30646	2.66309
385.984	3.25815	3.07587
394.082	6.03491	2.72047
402.18	4.84032	2.78987
410.279	4.48878	2.78848
418.377	3.45173	2.79685
426.475	3.90977	2.93917
434.574	4.39122	2.99401
442.672	4.95495	3.20775
450.77	4.1958	2.72455
458.869	4.3	3
466.967	3.6	3
475.066	3.8404	3.06053
483.164	3.30661	3.27929
491.262	3.45518	3.8922
499.361	3.3033	3.4125
507.459	3.75188	3.61544
515.557	3.70556	3.96049
523.656	3.25488	3.68735
531.754	4.44112	3.67447
539.852	4.19371	3.94862
547.951	3.15473	3.4825
556.036	3.35335	3.75375
564.107	2.49501	3.87861
572.179	2.15539	3.55434
580.25	2.25	3.75
588.321	2.50125	4.09296
596.393	3.10777	3.7594
604.464	2.35235	3.75375
612.536	2.7986	3.74813
620.607	2.94853	4.22516
628.679	4.30862	3.82583
636.75	4.00802	3.82583
644.821	3.64271	3.81056
652.893	2.9029	3.6855
660.964	3.10621	3.89415
668.929	4.30862	3.55256
676.786	2.9029	3.276
684.643	2.94705	3.13323
692.5	2.85143	3.20615
700.357	2.70406	3.20936
708.214	3.1984	3.06665
716.071	3.30165	3.20615
723.929	3.30165	3.20615
731.786	3.65548	3.00451
739.643	2.4975	3.20134
747.5	2.79441	2.92597
755.357	2.8028	2.93475
763.214	2.7972	2.86078
771.071	3.2	3
778.929	4.3978	2.93035
786.786	4.25638	3.07279
794.643	5.05759	3.00451
802.5	4.49102	3.1301
810.357	3.09381	2.65378
818.214	4.75238	3.0015
826.071	5.75576	3.4125
833.929	6.06212	3.00601
841.786	4.74289	3.06359
849.643	7.15716	2.93475
857.5	5.34466	4.4955
865.357	8.25413	3.20615
873.214	4.4	2.72727
881.071	4.8	2.31818
890.238	8.44156	2.86078
900.714	7.93809	2.38279
911.19	5.34733	2.04443
921.667	6.25939	7.57955
932.143	8.54146	2.24775
942.619	9	2.18182
953.095	3.74625	2.58832
963.571	4.75	12.6136
974.048	4.09386	4.83366
984.524	4.2394	2.24439
995	3.1	1.90909
